# Supplementary material for: Water intake, faecal output and intestinal motility in horses moved from pasture to a stabled management regime with controlled exercise
Source: PubMed Central journal article supplement — Equine Vet J. 2014 Mar 21;47(1):96–100. doi: 10.1111/evj.12238 (PMC4303976; doi:10.1111/evj.12238), 2014-03-21
Supplement: evj0047-0096-sd3.pdf [file evj0047-0096-sd3.pdf]

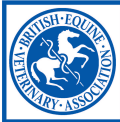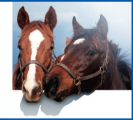

## Supplementary Item 3:

Q-Q plots of standardised level 1 residuals for faecal dry matter model and intestinal contractions model

Fig A: Q-Q plot of standardised level 1 residuals for the faecal dry matter model for 7 horses during a transition from pasture to stabled management regime.

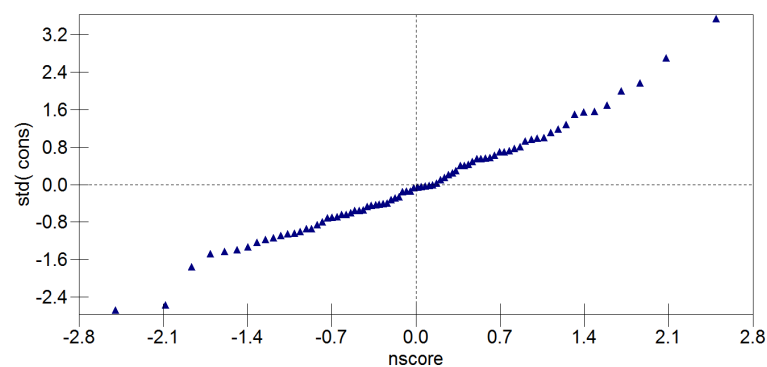

Fig B: Q-Q plot of standardised level 1 residuals for the contractions model for 7 horses during a transition from pasture to stabled management regime.

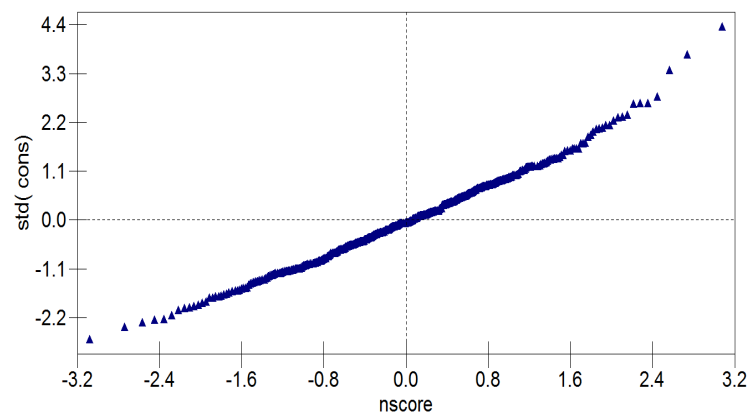

These Q-Q plots of standardised level 1 residuals illustrate that residuals are approximately normally distributed and are in line with model assumptions, suggesting a good model fit to the data.
