# Supplementary material for: Water intake, faecal output and intestinal motility in horses moved from pasture to a stabled management regime with controlled exercise
Source: PubMed Central journal article supplement — Equine Vet J. 2014 Mar 21;47(1):96–100. doi: 10.1111/evj.12238 (PMC4303976; doi:10.1111/evj.12238), 2014-03-21
Supplement: evj0047-0096-sd5.pdf [file evj0047-0096-sd5.pdf]

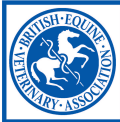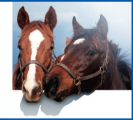

## Supplementary Item 5:

Final model of intestinal motility (contractions/minute) for seven horses during a transition from pasture to stabled management regime. Intestinal motility was measured twice daily (AM and PM) using transcutaneous ultrasonography in three regions of the large intestine (caecum, sternal flexure and aboral left ventral colon). Coefficients show the mean difference of each predictor variable from the reference category. Standard errors which are less than half of each coefficient are significant at  $p < 0.05^*$ .

| Intestinal motility (contractions/min)     |              |                 |                     |
|--------------------------------------------|--------------|-----------------|---------------------|
| Predictor Variables                        | Coefficients | Standard Error* | Confidence interval |
| Intercept                                  | 2.8          |                 |                     |
| Region of large colon (caecum)             | Ref category |                 |                     |
| Region of large colon (sternal flexure)    | -0.45        | 0.09            | (-0.63, -0.27)      |
| Region of large colon (left ventral colon) | -1.6         | 0.09            | (-1.78, -1.42)      |
| Day 0                                      | Ref category |                 |                     |
| Day 1                                      | -0.06        | 0.14            | (-0.33, 0.21)       |
| 2                                          | -0.76        | 0.14*           | (-1.03, -0.49)      |
| 3                                          | 0.24         | 0.14            | (-0.03, 0.51)       |
| 4                                          | -0.05        | 0.17            | (-0.38, 0.28)       |
| 5                                          | 0.31         | 0.14            | (0.04, 0.58)        |
| 6                                          | 0.12         | 0.14            | (-0.15, 0.39)       |
| 8                                          | -0.20        | 0.14            | (-0.47, 0.07)       |
| 10                                         | -0.23        | 0.14            | (-0.50, 0.04)       |
| 12                                         | 0.07         | 0.14            | (-0.20, 0.34)       |
| 15                                         | -0.14        | 0.14            | (-0.41, 0.13)       |
| Interaction: Day 4 x left ventral colon    | -0.63        | 0.28*           | (-1.18, -0.08)      |
